# Supplementary material
Source: Elsevier journal article supplement (https://www.sciencedirect.com/science/article/pii/S2530018022000245)
Supplement: mmc1 [file S2530018022000245:mmc1.docx]

**MATERIAL SUPLEMENTARIO**

**Casuística de las revistas analizadas**

EX= Excepcionalmente, NE = No Especifica, ND = No Disponible, NA = No editada en ese año

*extraída de fuentes distintas del Journal Citation Reports

**R** Revista de revisión

| **Nombre revista** | **Admite casos** | **Exige pago** | **Factor Impacto** | | | **Casos clínicos publicados** | | | **Total artículos publicados** | | |
| --- | --- | --- | --- | --- | --- | --- | --- | --- | --- | --- | --- |
| **2019** | **2015** | **2010** | **2019** | **2015** | **2010** | **2019** | **2015** | **2010** |
| Endocrinología, diabetes y nutrición | Sí | No | 1,180 | 1,314 | ND | 19 | 31 | 30 | 159 | 127 | 111 |
| Archives of endocrinology and metabolism | Sí | No | 1,802 | 1,22 * | ND | 5 | 24 | NA | 100 | 111 | NA |
| Journal of diabetes research | No | No | 2,965 | 2,431 | ND | 0 | 0 | NA | 237 | 341 | NA |
| The lancet. Diabetes & endocrinology | No | No | 25,34 | 16,320 | ND | 0 | 5 | NA | 239 | 283 | NA |
| Nutrition & diabetes | No | No | 4,357 | 2,773 | ND | 0 | 0 | NA | 36 | 45 | NA |
| Endocrinology and metabolism (Seoul, Korea) | No | No | 3,257 | 2,78 * | ND | 0 | 0 | NA | 53 | 91 | NA |
| Hormone molecular biology and clinical investigation | Sí | No | 2,43 * | 1,38 * | ND | 4 | 0 | 0 | 52 | 51 | 71 |
| Hormone research in pædiatrics | Sí | No | 2,174 | 1,661 | ND | 27 | 27 | 28 | 97 | 136 | 171 |
| Hormones & cancer | Sí | No | 2,437 | 3,167 | ND | 0 | 0 | 2 | 25 | 40 | 37 |
| Journal of diabetes investigation | Sí | No | 3,761 | 2,294 | ND | 14 | 5 | 0 | 315 | 180 | 51 |
| Journal of diabetes | Sí | No | 3,280 | 2,500 | ND | 4 | 5 | 2 | 178 | 182 | 43 |
| Nature reviews. Endocrinology **R** | No | No | 28,800 | 15,432 | 9,191 | 0 | 0 | 9 | 154 | 231 | 190 |
| Journal of clinical research in pediatric endocrinology | Sí | No | 1,803 | 1,568 | 0,195 * | 19 | 32 | 16 | 104 | 93 | 36 |
| Current opinion in endocrinology, diabetes and obesity **R** | No | No | 3,504 | 3,119 | 3,080 | 0 | 0 | 0 | 52 | 73 | 86 |
| Diabetes & metabolic síndrome | Sí | No | 2,709 | 2,119 | ND | 12 | 1 | 1 | 508 | 127 | 17 |
| Journal of diabetes science and technology | Sí | No | 3,43 * | 2,62 * | 1787* | 1 | 2 | 5 | 365 | 237 | 197 |
| Pediatric endocrinology, diabetes, and metabolism | Sí | No | 0,485 * | 0,04 * | 0,285 * | 24 | 14 | 18 | 35 | 30 | 51 |
| Sexual development : genetics, molecular biology, evolution, endocrinology, embryology, and pathology of sex determination and differentiation | Sí | No | 2,028 | 2,456 | 3,050 | 9 | 15 | 7 | 29 | 37 | 43 |
| Endocrine, metabolic & immune disorders drug targets | Sí | Sí | 1,973 | 2,139 | 3,246 * | 12 | 1 | 0 | 147 | 45 | 39 |
| Expert review of endocrinology & metabolism | No | No | 1,959 | 0,56 * | 0,641 * | 0 | 0 | 0 | 40 | 68 | 75 |
| Current diabetes reviews | Sí | Sí | 2,087 | 3,16 * | 3,551 | 4 | 0 | 1 | 95 | 42 | 45 |
| Diabetes & vascular disease research | Sí | No | 2,707 | 3,035 | 2,468 | 0 | 0 | 0 | 81 | 75 | 39 |
| The review of diabetic studies : RDS | Sí | No | 1,933 | 1,95 * | ND | 0 | 0 | 0 | 10 | 20 | 27 |
| Pediatric endocrinology reviews : PER  **R** | Sí | NE | 1,85 | 2,372 | 0,432 * | 2 | 2 | 2 | 32 | 33 | 60 |
| Reproductive biology and endocrinology : RB&E | Sí | Sí | 3,235 | 2,147 | 2,023 | 0 | 1 | 2 | 113 | 136 | 156 |
| Canadian journal of diabetes | Sí | No | 3,062 | 2,509 | 0,498 * | 8 | 6 | 0 | 168 | 142 | 10 |
| Cardiovascular diabetology | Sí | Sí | 7,332 | 4,534 | 2,720 | 0 | 0 | 0 | 172 | 154 | 93 |
| Hormones (Athens, Grece) | Sí | No | 1,962 | 1,542 | ND | 21 | 27 | 20 | 91 | 78 | 42 |
| Best practice & research. Clinical endocrinology & metabolism **R** | No | NE | 3,701 | 5,070 | 4,190 | 0 | 0 | 0 | 82 | 80 | 79 |
| BMC endocrine disorders | Sí | Sí | 1,994 | 1,739 | ND | 27 | 14 | 0 | 145 | 83 | 21 |
| Current diabetes reports **R** | No | NE | 3,686 | 3,711 | 2,210 | 1 | 0 | 0 | 163 | 128 | 77 |
| Pancreatology : official journal of the International Association of Pancreatology (IAP) ... [et al.]. | Sí | Sí | 3,629 | 2,791 | 2,128 | 2 | 19 | 0 | 202 | 166 | 79 |
| Pediatric diabetes | Sí | No | 3,052 | 3,488 | 2,171 | 6 | 9 | 10 | 174 | 139 | 118 |
| Primary care diabetes | No | No | 2,052 | 1,570 | 1,492 | 0 | 0 | 0 | 122 | 103 | 54 |
| Reviews in endocrine & metabolic disorders **R** | Sí | No | 6,192 | 5,088 | 4,083 | 0 | 0 | 0 | 44 | 34 | 32 |
| Diabetes/metabolism research and reviews | No | No | 3,314 | 3,512 | 3,094 | 0 | 0 | 1 | 176 | 139 | 90 |
| Diabetes, obesity & metabolism | No | No | 5,900 | 7,746 | 3,415 | 1 | 0 | 0 | 411 | 197 | 157 |
| Diabetes technology & therapeutics | Sí | No | 4,392 | 2,198 | 2,146 | 0 | 1 | 4 | 156 | 166 | 157 |
| Growth hormone & IGF research : official journal of the Growth Hormone Research Society and the International IGF Research Society | Sí | No | 1,618 | 1,448 | 2,229 | 3 | 2 | 1 | 44 | 70 | 68 |
| Pituitary | No | No | 3,954 | 3,407 | 2,282 | 2 | 14 | 24 | 77 | 117 | 58 |
| Prostaglandins & other lipid mediators | No | No | 2,283 | 2,905 | 2,033 | 0 | 0 | 0 | 69 | 76 | 55 |
| Diabetes & metabolism | Sí | No | 4,731 | 4,693 | 3,033 | 10 | 3 | 1 | 154 | 109 | 133 |
| Endocrine practice : official journal of the American College of Endocrinology and the American Association of Clinical Endocrinologists | Sí | Sí | 3,869 | 2,074 | ND | 22 | 27 | 59 | 244 | 259 | 170 |
| Experimental and clinical endocrinology & diabetes : official journal, German Society of Endocrinology [and] German Diabetes Association | No | Sí | 2,058 | 1,665 | 1,826 | 0 | 1 | 15 | 201 | 128 | 178 |
| Journal of pediatric endocrinology & metabolism : JPEM | Sí | Sí | 1,278 | 0,912 | 0,887 | 48 | 79 | 69 | 199 | 226 | 194 |
| Endocrine-related cancer | Sí | No | 4,800 | 4,472 | 4,432 | 0 | 3 | 1 | 114 | 150 | 123 |
| Endocrine | Sí | No | 3,235 | 3,279 | 1,373 | 20 | 46 | 25 | 429 | 540 | 153 |
| European journal of endocrinology | Sí | No | 5,308 | 3,892 | 3,482 | 14 | 15 | 18 | 168 | 310 | 316 |
| Endocrine journal | Sí | Sí | 1,952 | 1,895 | 1,952 | 23 | 19 | 37 | 171 | 157 | 159 |
| Journal of diabetes and its complications | Sí | No | 2,781 | 2,955 | 2,147 | 0 | 3 | 6 | 195 | 320 | 90 |
| Acta diabetologica | Si | No | 3,418 | 3,074 | 3,175 | 7 | 6 | 5 | 248 | 199 | 133 |
| Endocrine regulations | Sí | NE | 1,44 | 1,3 * | ND | 1 | 1 | 1 | 27 | 26 | 20 |
| Endocrine pathology | Sí | No | 3,168 | 1,817 | 1,568 | 6 | 29 | 12 | 43 | 63 | 42 |
| Thyroid : official journal of the American Thyroid Association | Sí | Sí | 5,227 | 3,784 | 4,327 | 3 | 13 | 65 | 223 | 213 | 266 |
| Journal of neuroendocrinology **R** | No | NE | 2,886 | 3,172 | 4,650 | 0 | 0 | 0 | 147 | 88 | 143 |
| Trends in endocrinology and metabolism: TEM **R** | No | No | 11,641 | 8,964 | 8,479 | 0 | 1 | 0 | 118 | 110 | 99 |
| Journal of molecular endocrinology | No | No | 3,562 | 2,947 | 3,628 | 0 | 1 | 0 | 63 | 95 | 66 |
| Prostaglandins, leukotrienes, and essential fatty acids | No | NE | 2,932 | 3,155 | 1,653 | 0 | 0 | 0 | 73 | 97 | 90 |
| Endocrinology and metabolism clinics of North America **R** | No | NE | 3,813 | 3,305 | 4,330 | 0 | 0 | 0 | 79 | 63 | 61 |
| Gynecological endocrinology : the official journal of the International Society of Gynecological Endocrinology | Sí | No | 1,571 | 1,413 | 1,461 | 30 | 25 | 24 | 359 | 302 | 278 |
| Diabetes research and clinical practice | Sí | NE | 4,234 | 3,045 | 2,134 | 2 | 10 | 15 | 414 | 309 | 366 |
| Diabetic medicine : a journal of the British Diabetic Association | Sí | No | 3,083 | 3,152 | 3,036 | 6 | 9 | 21 | 354 | 380 | 255 |
| Endocrine research | Sí | No | 1,553 | 1,476 | 1,043 | 2 | 3 | 1 | 33 | 49 | 40 |
| Journal of pineal research | EX | No | 14,528 | 9,314 | 5,855 | 0 | 1 | 0 | 93 | 103 | 116 |
| American journal of physiology. Endocrinology and metabolism | No | No | 34,69 | 3,825 | 4,686 | 0 | 0 | 0 | 244 | 248 | 321 |
| Endocrine reviews **R** | No | No | 14,661 | 14,898 | 22,469 | 0 | 0 | 0 | 57 | 30 | 39 |
| Journal of endocrinological investigation | Sí | No | 3,397 | 1,994 | 1,476 | 6 | 10 | 21 | 264 | 251 | 301 |
| Minerva endocrinologica | Sí | No | 1,529 | 1,118 | 1,237 | 0 | 2 | 2 | 80 | 54 | 25 |
| The Diabetes educator | No | No | 2,087 | 1,595 | 1,947 | 0 | 0 | 0 | 62 | 72 | 81 |
| Psychoneuroendocrinology | EX | No | 4,732 | 4,704 | 5,168 | 0 | 0 | 1 | 475 | 373 | 256 |
| Molecular and cellular endocrinology | EX | No | 3,871 | 3,859 | 4,119 | 0 | 1 | 0 | 321 | 487 | 472 |
| Clinical endocrinology | EX | No | 3,380 | 3,487 | 3,323 | 2 | 17 | 15 | 255 | 406 | 266 |
| Frontiers in neuroendocrinology **R** | No | No | 9,059 | 8,852 | 12,750 | 0 | 0 | 0 | 69 | 44 | 51 |
| Hormone and metabolic research = Hormon- und Stoffwechselforschung = Hormones et métabolisme | Sí | No | 2,562 | 2,029 | 2,414 | 0 | 6 | 3 | 108 | 187 | 191 |
| Hormones and behavior | No | NE | 3,684 | 3,340 | 3,991 | 0 | 0 | 0 | 177 | 212 | 246 |
| Diabetologia | Sí | No | 7,518 | 6,206 | 6,973 | 0 | 0 | 5 | 302 | 428 | 453 |
| Neuroendocrinology | Sí | No | 4,271 | 2,583 | 3,272 | 1 | 1 | 1 | 147 | 118 | 87 |
| General and comparative endocrinology | No | No | 2,426 | 2,667 | 3,108 | 0 | 0 | 0 | 330 | 363 | 374 |
| Diabetes | Sí | No | 7,720 | 8,784 | 8,889 | 1 | 2 | 2 | 279 | 543 | 448 |
| The Journal of clinical endocrinology and metabolism | Sí | Sí | 5,399 | 6,304 | 6,495 | 33 | 55 | 88 | 710 | 958 | 925 |
| Endokrynologia Polska | Sí | Sí | 1,322 | 1,112 | 0,792 * | 8 | 9 | 13 | 81 | 68 | 98 |
| Vitamins and hormones **R** | No | NE | 2,557 | 2,161 | 2,890 | 0 | 0 | 0 | 67 | 52 | 64 |
| The Journal of endocrinology | No | No | 4,041 | 4,498 | 3,099 | 0 | 0 | 0 | 125 | 151 | 156 |
| Endocrinology | No | Sí | 3,934 | 4,159 | 4,993 | 0 | 0 | 0 | 256 | 547 | 674 |
